# Supplementary material for: Monomeric Ti(iv)-based complexes incorporating luminescent nitrogen ligands: synthesis, structural characterization, emission spectroscopy and cytotoxic activities
Source: Royal Society of Chemistry journal article supplement (doi:10.1039/c6dt03477b), 2016-01-01
Supplement: c6dt03477b1.pdf [file c6dt03477b1.pdf]

## Monomeric Ti(IV)-based complexes incorporating luminescent nitrogen ligands : synthesis, structural characterization, emission spectroscopy and cytotoxic activities

Georges Khalil,<sup>a</sup> Christophe Orvain,<sup>b,c</sup> Lu Fang,<sup>a</sup> Laurent Barloy,<sup>a</sup> Alain Chaumont,<sup>a,d</sup>  
Christian Gaiddon,<sup>b,c</sup> Marc Henry,<sup>a</sup> Nathalie Kyritsakas,<sup>e</sup> Pierre Mobian<sup>a</sup>

<sup>a</sup> Laboratoire de Chimie Moléculaire de l'Etat Solide, UMR 7140 UDS-CNRS, Université de Strasbourg, 4 rue Blaise Pascal, F-67000 Strasbourg, France.  
mobian@unistra.fr.

<sup>b</sup> Laboratoire des "Mécanismes moléculaires de la réponse au stress et pathologies" Inserm U1113 3 avenue Molière - 67200 Strasbourg, France.

<sup>c</sup> Département Cancer, Fédération de Médecine Translationnelle de Strasbourg, Université de Strasbourg, 67200 Strasbourg, France.

<sup>d</sup> Laboratoire de Modélisation et Simulations Moléculaires, UMR 7177 UDS-CNRS, Université de Strasbourg, 1 rue Blaise Pascal, F-67000 Strasbourg, France.

<sup>e</sup> Laboratoire de Tectonique Moléculaire, UMR 7140 UDS-CNRS, Université de Strasbourg, 4 rue Blaise Pascal, F-67000 Strasbourg, France.

### Supporting Information

#### Contents

- Photoluminescence: excitation and emission spectra 1
- Photoluminescence: determination of lifetimes 7
- [Ti(1)<sub>2</sub>(2c)] complex: HOMO-6 and HOMO-7 representations 8

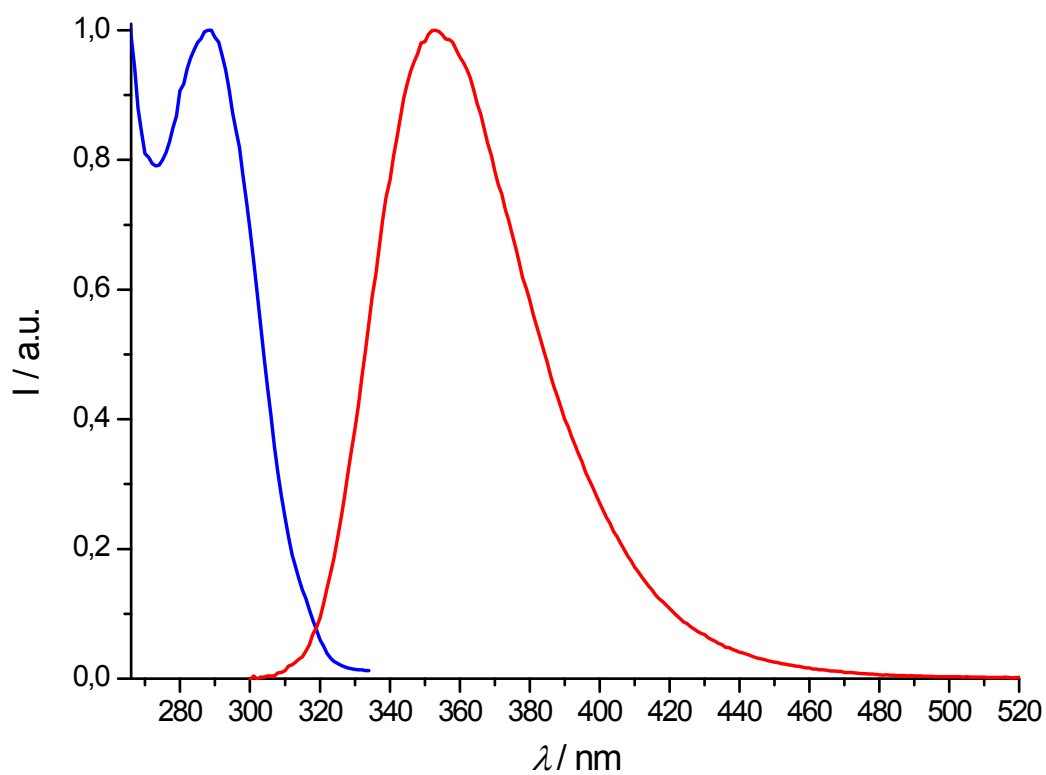

**Figure S1.** Normalized excitation spectrum ( $\lambda_{\text{em}} = 350 \text{ nm}$ , blue) and emission spectrum ( $\lambda_{\text{exc}} = 290 \text{ nm}$ , red) of compound **1-H<sub>2</sub>** recorded at room temperature in  $\text{CH}_2\text{Cl}_2$  (concentration  $2.95 \mu\text{M}$ ).

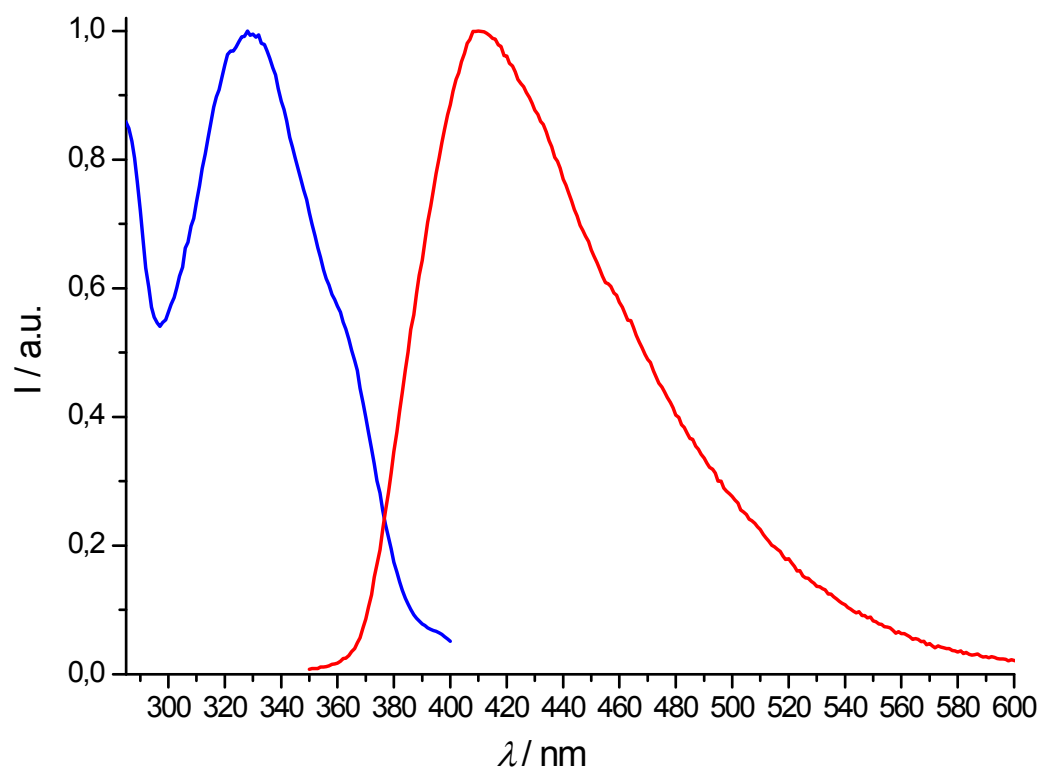

**Figure S2.** Normalized excitation spectrum ( $\lambda_{\text{em}} = 411 \text{ nm}$ , blue) and emission spectrum ( $\lambda_{\text{exc}} = 332 \text{ nm}$ , red) of compound **2c** recorded at room temperature in  $\text{CH}_2\text{Cl}_2$  (concentration  $3.14 \mu\text{M}$ ).

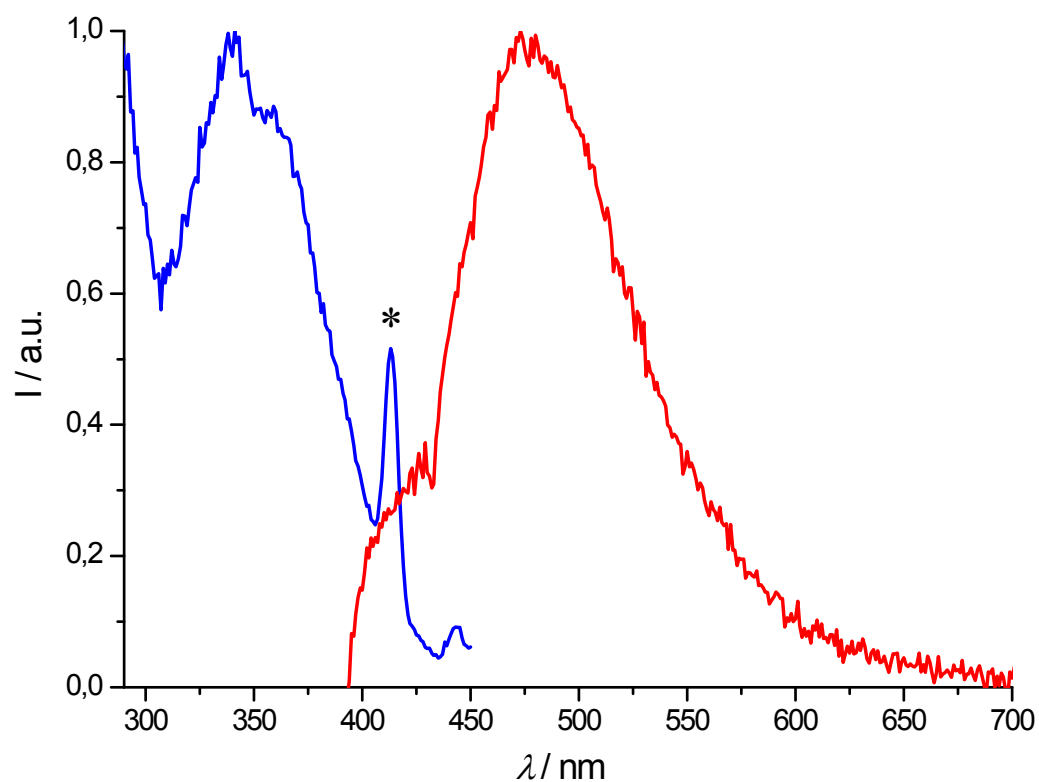

**Figure S3.** Normalized excitation spectrum (raw,  $\lambda_{\text{em}} = 473$  nm, blue) and emission spectrum ( $\lambda_{\text{exc}} = 380$  nm, red) of compound [Ti(1)<sub>2</sub>(2c)] recorded at room temperature in CH<sub>2</sub>Cl<sub>2</sub> (concentration 1.67  $\mu\text{M}$ ; \* = artifact).

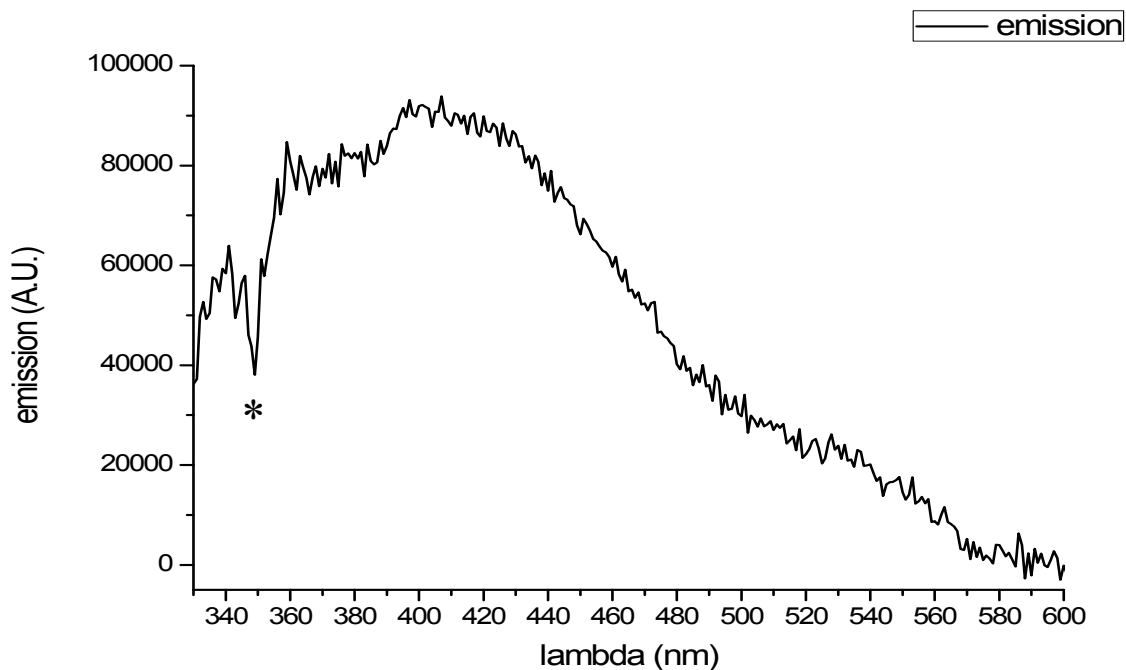

**Figure S4.** Emission spectrum ( $\lambda_{\text{exc}} = 315 \text{ nm}$ ) of compound **2b** recorded at room temperature in  $\text{CH}_2\text{Cl}_2$  (concentration  $1.81 \mu\text{M}$ ; \* = artifact).

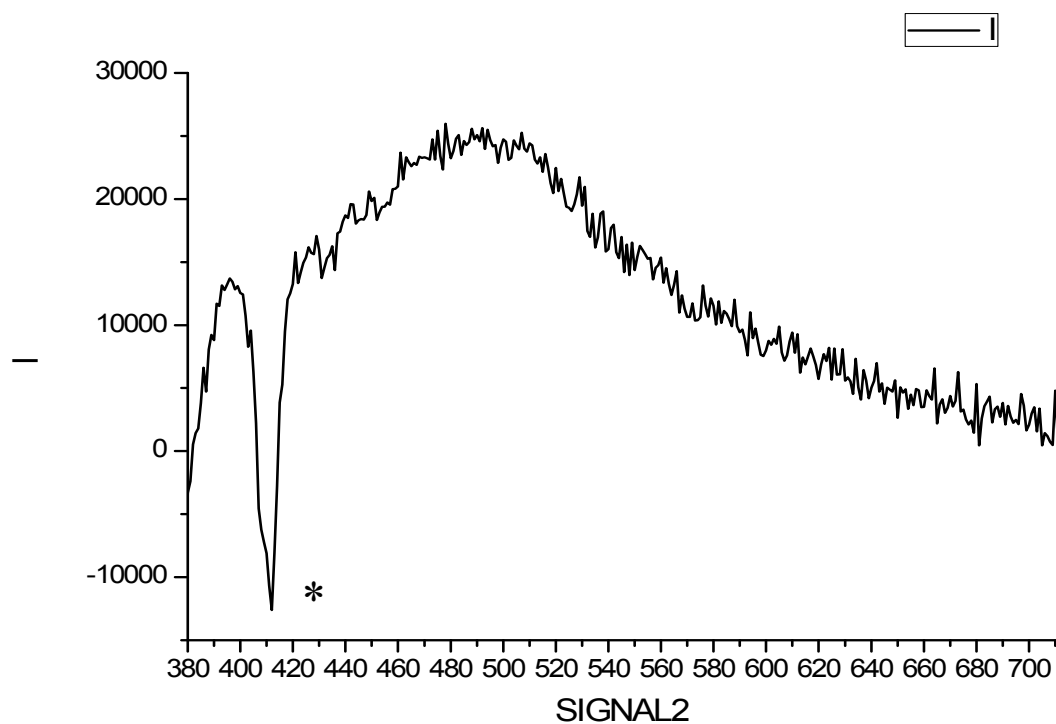

**Figure S5.** Emission spectrum ( $\lambda_{\text{exc}} = 365 \text{ nm}$ ) of compound  $[\text{Ti}(\mathbf{1})_2(\mathbf{2d})]$  recorded at room temperature in  $\text{CH}_2\text{Cl}_2$  (concentration  $2.25 \mu\text{M}$ ; \* = artifact).

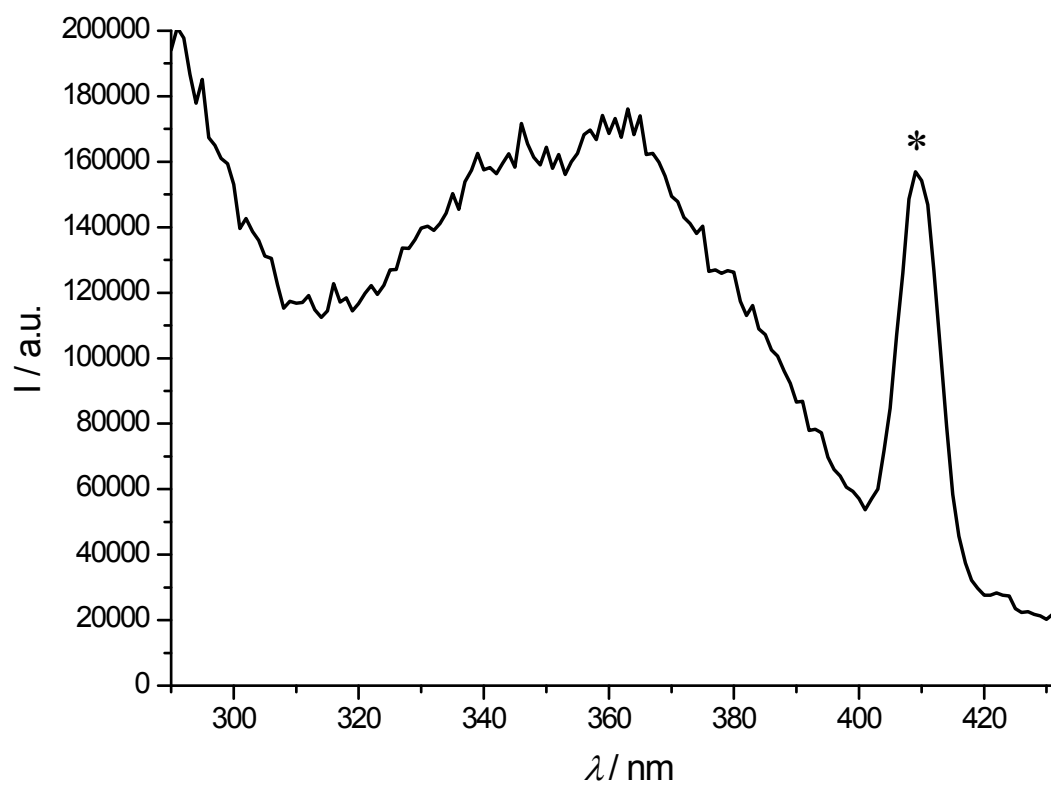

**Figure S6.** Excitation spectrum (raw,  $\lambda_{em} = 468$  nm) of compound [Ti(1)<sub>2</sub>(2d)] recorded at room temperature in CH<sub>2</sub>Cl<sub>2</sub> (concentration 2.25  $\mu$ M; \* = artifact).

**Table S1.** Fitted lifetimes determined from the luminescence decay spectra

| compounds              | $\lambda_{\text{LED}} / \text{nm}$ | $\lambda_{\text{em}} / \text{nm}$ | lifetime / ns                                                         |
|------------------------|------------------------------------|-----------------------------------|-----------------------------------------------------------------------|
| <b>1-H<sub>2</sub></b> | 296                                | 350                               | $\tau = 0.52$                                                         |
| <b>2b</b>              | 296                                | 395                               | $\tau_1 = 1.6$ (50%)<br>$\tau_2 = 0.14$ (17%)<br>$\tau_3 = 8.5$ (33%) |
| <b>2c</b>              | 340                                | 411                               | $\tau_1 = 0.09$ (86%)<br>$\tau_2 = 1.5$ (14%)                         |
| <b>2d</b>              | 375                                | 525                               | $\tau_1 = 0.12$ (96%)<br>$\tau_2 = 3.6$ (4%)                          |
| <b>3c</b>              | 375                                | 473                               | $\tau_1 = 0.5$ (41%)<br>$\tau_2 = 1.6$ (54%)<br>$\tau_3 = 6.1$ (5%)   |
| <b>3d</b>              | 375                                | 468                               | $\tau_1 = 2.1$ (40%)<br>$\tau_2 = 8.9$ (28%)<br>$\tau_3 = 0.34$ (32%) |

The luminescence decays were collected by a time-correlated single-photon-counting technique. The excitation source was a NanoLED-370 electroluminescent diode (Horiba Jobin Yvon) emitting at 375 nm and operated at a 1 MHz repetition rate. The bandpass of the emission double-grating monochromator was set at 2 nm for the measurements. The instrument response function was collected using a dilute scattering solution of Ludox (Sigma-Aldrich). The theoretical luminescence decays were assumed to be exponentials, or the sums of two or three exponentials. They were iteratively reconvoluted with the measured instrument response prior to fitting with the measured luminescence decays using the least-squares method of Fluorescence Decay Analysis Software DAS6 (Horiba Jobin Yvon). The goodness of fit was evaluated by the X2 criterion, the randomness of the residuals, and their autocorrelation.

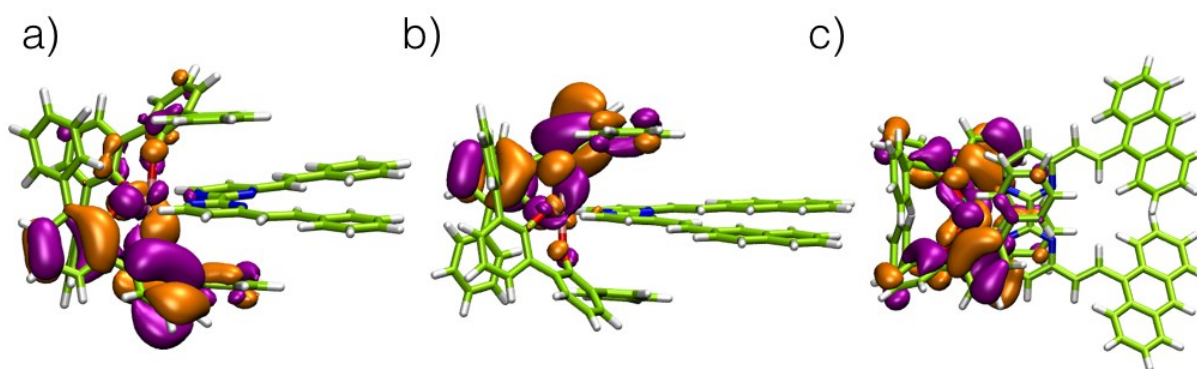

**Figure S7.** The HOMOs-1 are all centered on the biphenolato ligands.

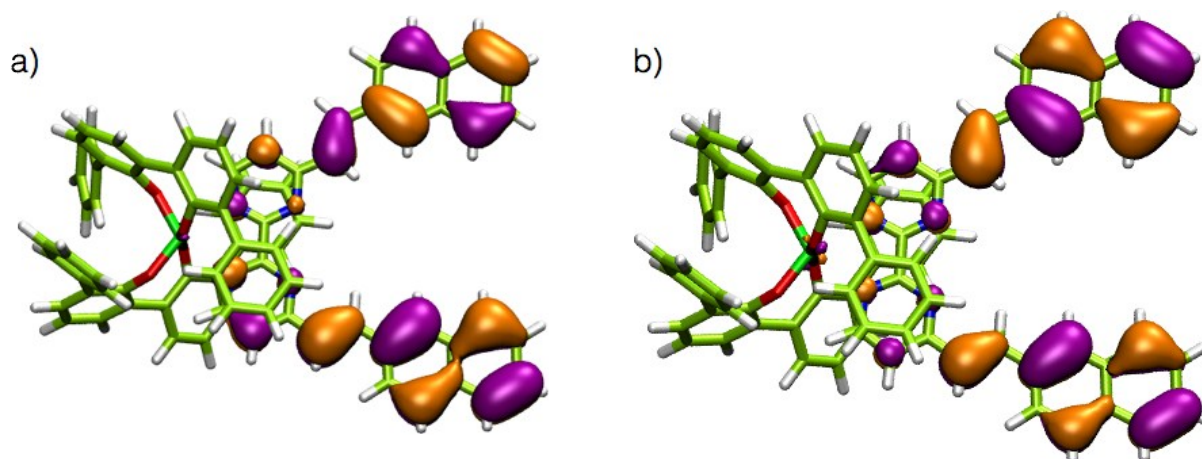

**Figure S8.** HOMO-6 (a) and HOMO-7 (b) representations of the  $[\text{Ti}(\mathbf{1})_2(\mathbf{2c})]$  complex.



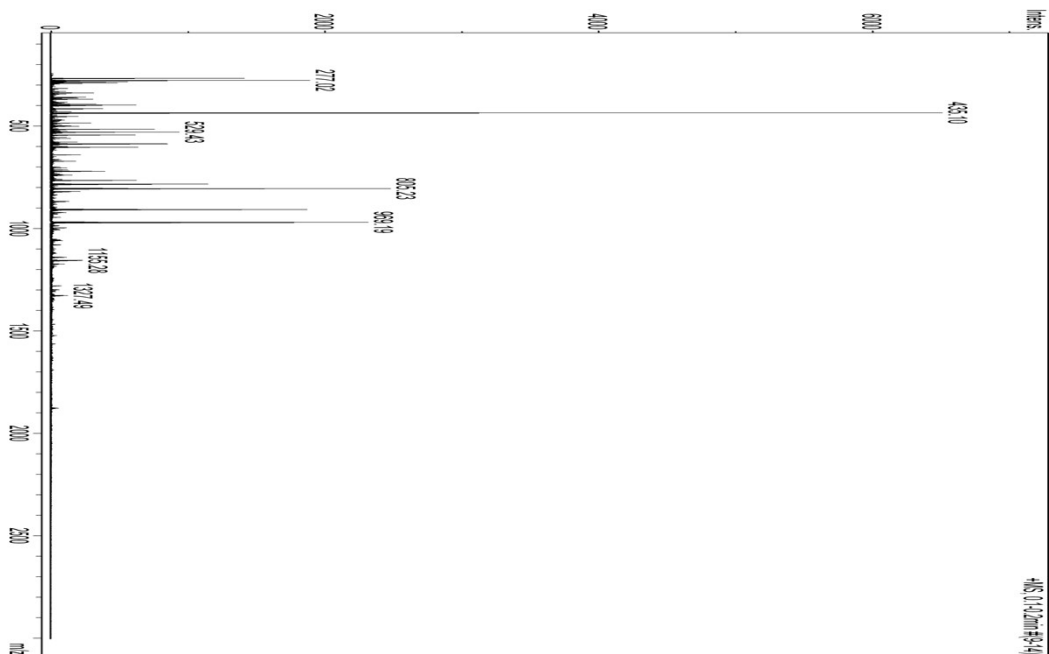

**Figure S9.** ES-MS of an aliquot of the solution of the  $[\text{Ti}(\mathbf{1})_2(\mathbf{2a})]$  complex in  $\text{DMSO-d}_6$  with  $\text{D}_2\text{O}$  revealing the formation of unknown hydrolytic products ( $[\text{Ti}(\mathbf{1})_2(\mathbf{2a})] = 906.27 \text{ g}\cdot\text{mol}^{-1}$ ,  $\mathbf{1}\text{-H}_2 = 338.13 \text{ g}\cdot\text{mol}^{-1}$ ,  $\mathbf{2a} = 186.09 \text{ g}\cdot\text{mol}^{-1}$ ).

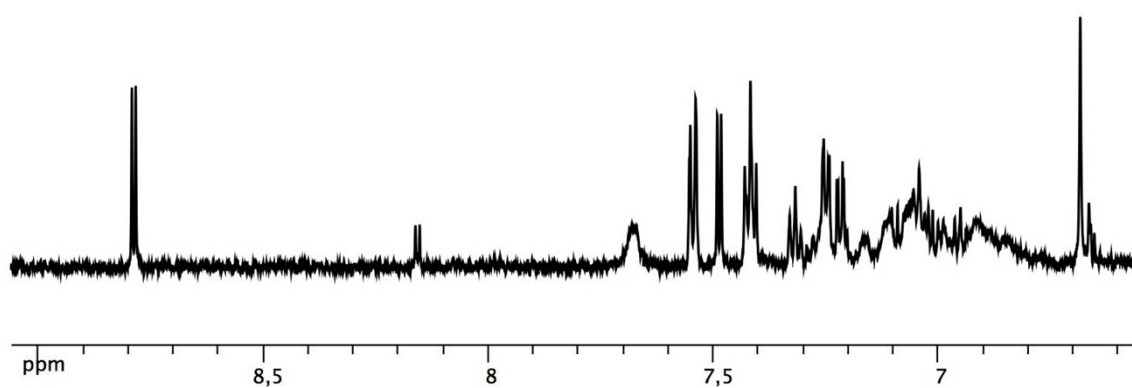

**Figure S10.** Aromatic region of the <sup>1</sup>H NMR spectrum of the solution of the [Ti(**1**)<sub>2</sub>(**2a**)] complex in DMSO-d<sub>6</sub> with D<sub>2</sub>O revealing the presence of large signals of unknown species.
